# Supplementary material for: Infrared spectra and electronic structural changes of DNTF under high pressure: experimental and theoretical studies
Source: Royal Society of Chemistry journal article supplement (doi:10.1039/d3cp04429g), 2024-01-01
Supplement: d3cp04429g1.pdf [file d3cp04429g1.pdf]

## **Supporting Information**

Infrared Spectra and Electronic Structural changes of DNTF under  
High Pressure: Experimental and Theoretical Study

Table S1. The vibration energy distribution of DNTF at ambient pressure.

| Theo. Freq. (cm <sup>-1</sup> ) | Exp. Freq. (cm <sup>-1</sup> ) | Vibration Energy Distribution                                                                |
|---------------------------------|--------------------------------|----------------------------------------------------------------------------------------------|
| 959                             | 963                            | N-O stretching vibration in furoxan rings                                                    |
| 1003                            | 1002                           | N-O stretching vibration in furoxan rings                                                    |
| 1040                            | 1042                           | N-C stretching vibration in furazan rings                                                    |
| 1176                            | 1176                           | C-C bending vibration and N-O stretching vibration in furoxan rings                          |
| 1290                            | 1285                           | C-C stretching vibration in furazan rings and NO <sub>2</sub> symmetric stretching vibration |
| 1322                            | 1319                           | NO <sub>2</sub> symmetric stretching vibration                                               |
| 1362                            | 1355                           | C-C stretching vibration in furazan rings                                                    |
| 1521                            | 1519                           | NO <sub>2</sub> asymmetric stretching vibration and little C-C stretching vibration          |
| 1555                            | 1564                           | C-C stretching vibration between furazan ring and furoxan ring                               |
|                                 | 1587                           | N-O <sub>c</sub> stretching vibration                                                        |
| 1640                            | 1641                           | N-O <sub>c</sub> stretching vibration                                                        |

Note: O<sub>c</sub> represents the coordinated oxygen atom.

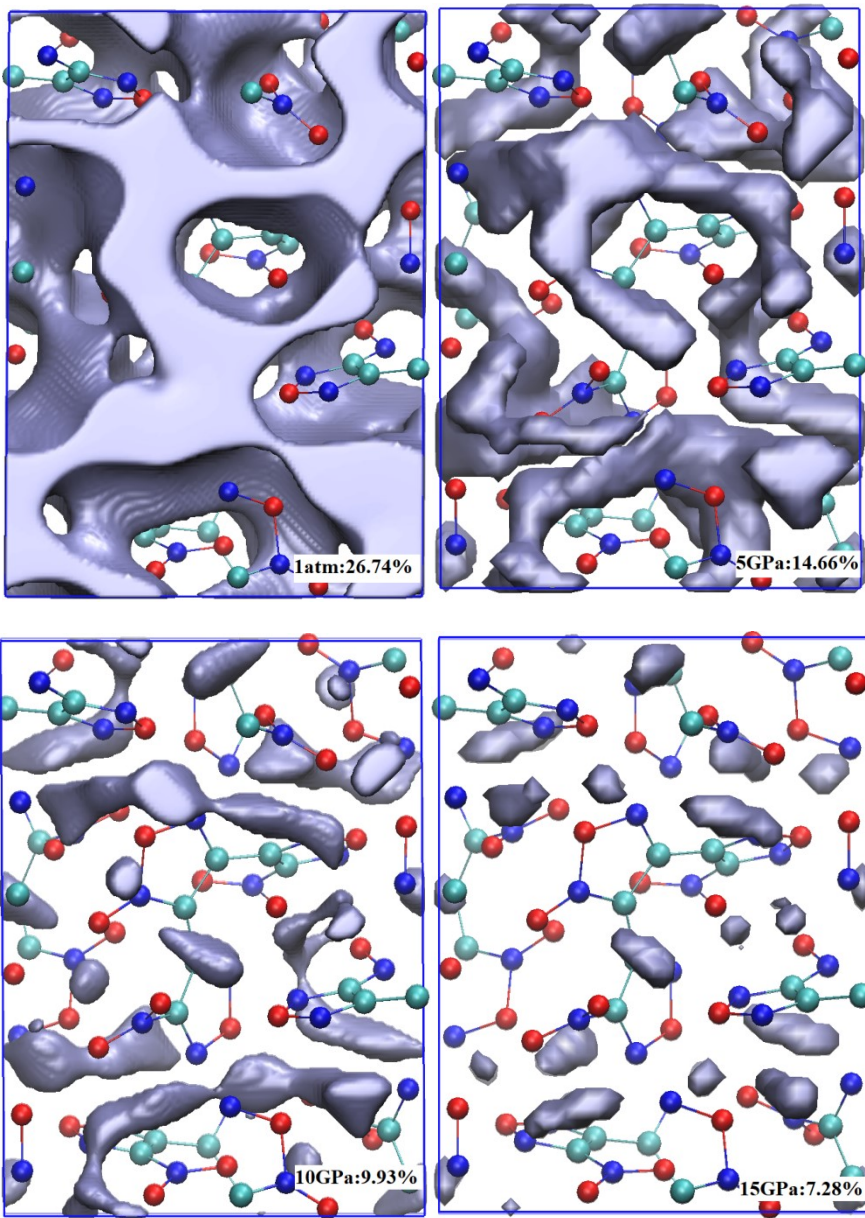

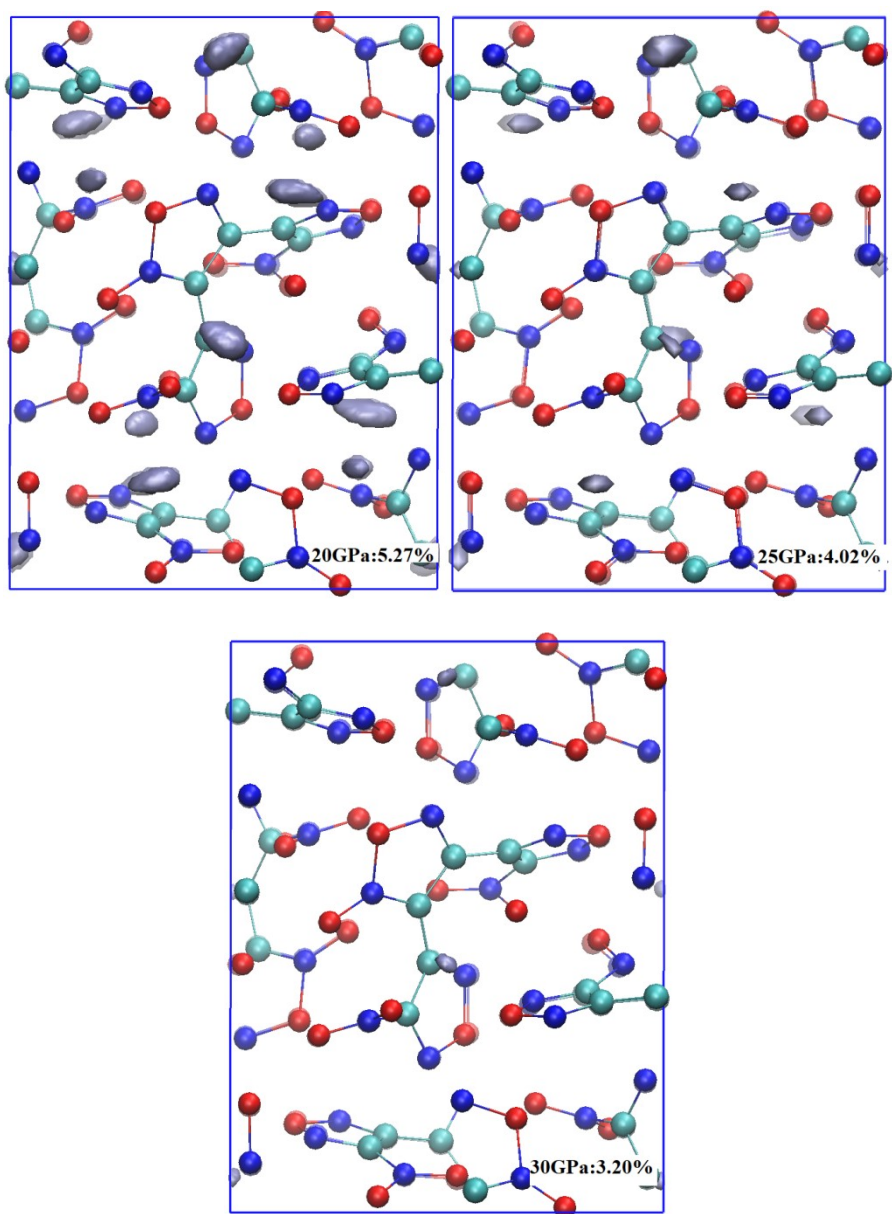

Figure S1. The evolution of free region in DNTF crystal at different pressure, and the iceblue isosurface represents the 0.03 a.u. region.
